# Supplementary material for: Comparative outcomes of selective laser trabeculoplasty delivered by optometrists compared with ophthalmologists: a UK-based multicentre observational study
Source: PubMed Central journal article supplement — BMJ Open Ophthalmol. 2024 Oct 2;9(1):e001870. doi: 10.1136/bmjophth-2024-001870 (PMC11448136; doi:10.1136/bmjophth-2024-001870), 2024-10-02
Supplement: bmjophth-9-1-s001.pdf [file bmjophth-9-1-s001.pdf]

## Supplementary appendix

Supplementary material for *Comparative outcomes of Selective Laser Trabeculoplasty delivered by optometrists compared to ophthalmologists: a UK-based multi-centre observational study*.

**Figure S1: Mean reduction in intraocular pressure of optometrist- vs ophthalmologist-treated eyes over time**

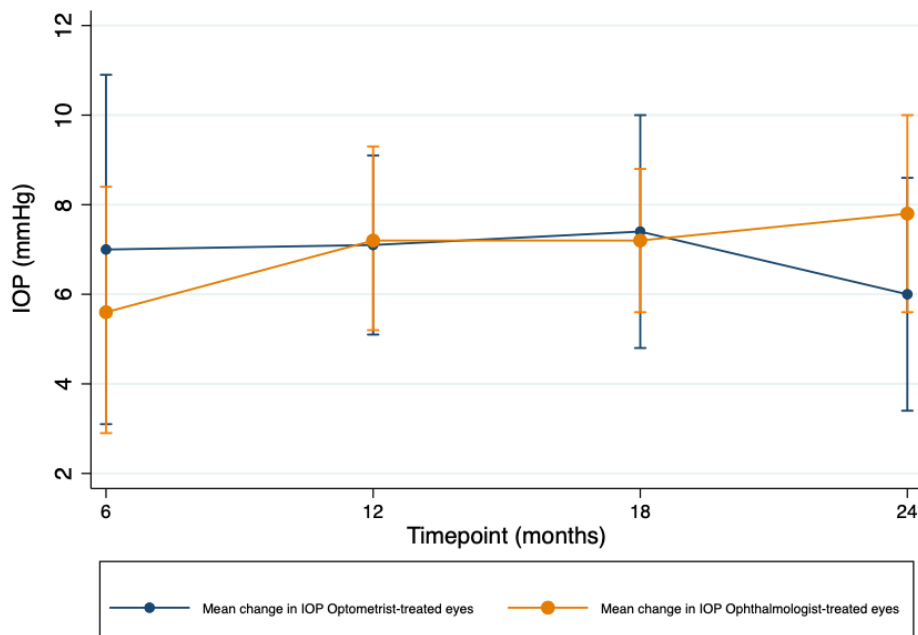

Figure S1: Mean reduction in intraocular pressure between Optometrist-treated and Ophthalmologist-treated eyes. Abbreviations: IOP, intraocular pressure; mmHg, millimeters of mercury.

**Figure S2: Median visual acuity of optometrist- vs ophthalmologist-treated eyes over time**

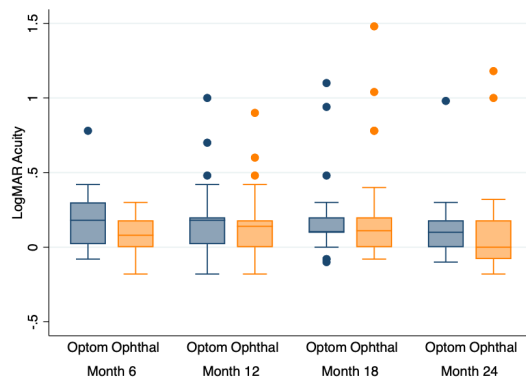

Figure S2: Median LogMAR visual acuity at each time between between Optometrist-treated and Ophthalmologist-treated eyes. Abbreviations: LogMAR, logarithm of the minimum angle of resolution; Optom, optometrist; Ophthal, ophthalmologist.

**Figure S3: Eyedrop burden by category disaggregated by optometrist- vs ophthalmologist-treated eyes**

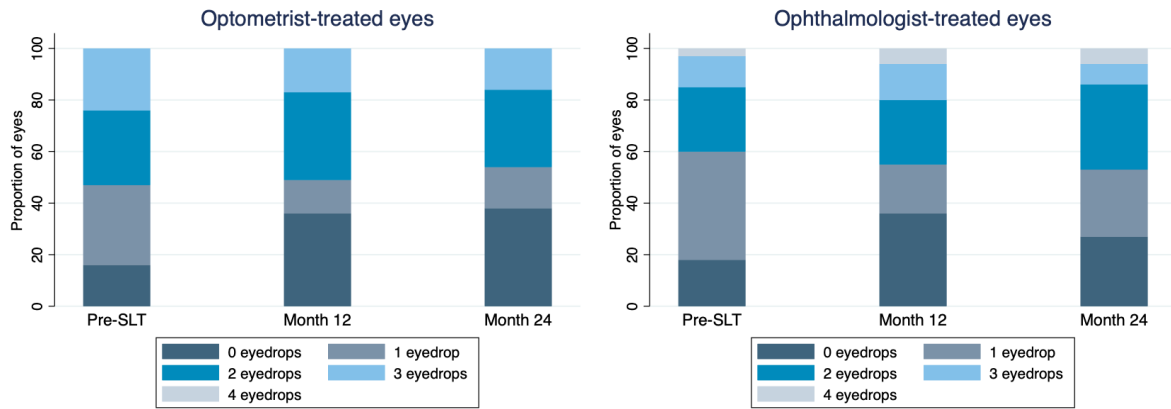

Figure S3: Proportion of eyes on 0, 1, 2, 3, or 4 eyedrops at LogMAR visual acuity at each time between between Optometrist-treated and Ophthalmologist-treated eyes. Abbreviations: SLT, selective laser trabeculoplasty.

**Table S1: Secondary diagnoses and safety events disaggregated by optometrist- vs ophthalmologist-treated eyes**

|                                                                                                  | Optometrist-treated eyes<br>(n = 84) | Ophthalmologist -treated eyes<br>(n = 123) |
|--------------------------------------------------------------------------------------------------|--------------------------------------|--------------------------------------------|
| <b>Secondary diagnoses recorded at 12 months, n (%)</b>                                          | <b>15 (18%)</b>                      | <b>10 (8%)</b>                             |
| Cataract                                                                                         | 6 (7%)                               | 3 (2%)                                     |
| Glaucoma progression                                                                             | 2 (2%)                               | 1                                          |
| Chalazion                                                                                        | 2 (2%)                               | 0                                          |
| Dry eye                                                                                          | 1                                    | 1                                          |
| Retinal vein occlusion                                                                           | 1                                    | 1                                          |
| Inflamed pingueculum                                                                             | 1                                    | 0                                          |
| Posterior capsular opacification                                                                 | 1                                    | 0                                          |
| Advanced age-related macular degeneration                                                        | 1                                    | 0                                          |
| Conjunctivitis                                                                                   | 0                                    | 1                                          |
| Venous stasis retinopathy                                                                        | 0                                    | 1                                          |
| Ocular ischaemic syndrome                                                                        | 0                                    | 1                                          |
| Posterior vitreous detachment                                                                    | 0                                    | 1                                          |
| <b>Secondary diagnoses recorded at 24 months, n (%)</b>                                          | <b>19 (23%)</b>                      | <b>20 (16%)</b>                            |
| Cataract                                                                                         | 10 (12%)                             | 9 (7%)                                     |
| Glaucoma progression                                                                             | 2 (2%)                               | 1 (1%)                                     |
| Chalazion                                                                                        | 2 (2%)                               | 0                                          |
| Primary angle closure glaucoma                                                                   | 0                                    | 2 (2%)                                     |
| Dry eye                                                                                          | 1                                    | 1                                          |
| Retinal vein occlusion                                                                           | 1                                    | 1                                          |
| Posterior capsular opacification                                                                 | 1                                    | 1                                          |
| Inflamed pingueculum                                                                             | 1                                    | 0                                          |
| Advanced age-related macular degeneration                                                        | 1                                    | 0                                          |
| Conjunctivitis                                                                                   | 0                                    | 1                                          |
| Venous stasis retinopathy                                                                        | 0                                    | 1                                          |
| Ocular ischaemic syndrome                                                                        | 0                                    | 1                                          |
| Posterior vitreous detachment                                                                    | 0                                    | 1                                          |
| Aqueous misdirection syndrome                                                                    | 0                                    | 1                                          |
| <b>Adverse events attributed to SLT overall, n (%)</b>                                           | <b>2 (2%)</b>                        | <b>3 (2%)</b>                              |
| Post-laser IOP spike [IOP <sup>3</sup> 30mmHg, or <sup>3</sup> 10mmHg compared to pre-laser IOP] | 1                                    | 2                                          |
| Inflamed pingueculum                                                                             | 1                                    | 0                                          |
| Venous stasis retinopathy                                                                        | 0                                    | 1                                          |
| <b>Patients registered sight impaired, n (%)</b>                                                 | <b>1 (1%)</b>                        | <b>1 (1%)</b>                              |
| Macular degeneration                                                                             | 1                                    | 0                                          |
| Glaucoma progression                                                                             | 0                                    | 1                                          |

*Table S1: Data are count (%). Abbreviations: IOP, intraocular pressure; mmHg, millimetres of mercury; LogMAR, Logarithm of the Minimum Angle of Resolution; IQR, interquartile range; VA, visual acuity.*
